# Supplementary material
Source: Springer Nature journal article supplement (https://www.springermedizin.de/resource/supplementary/13058_2012_3224_MOESM15_ESM.pdf/9703556)

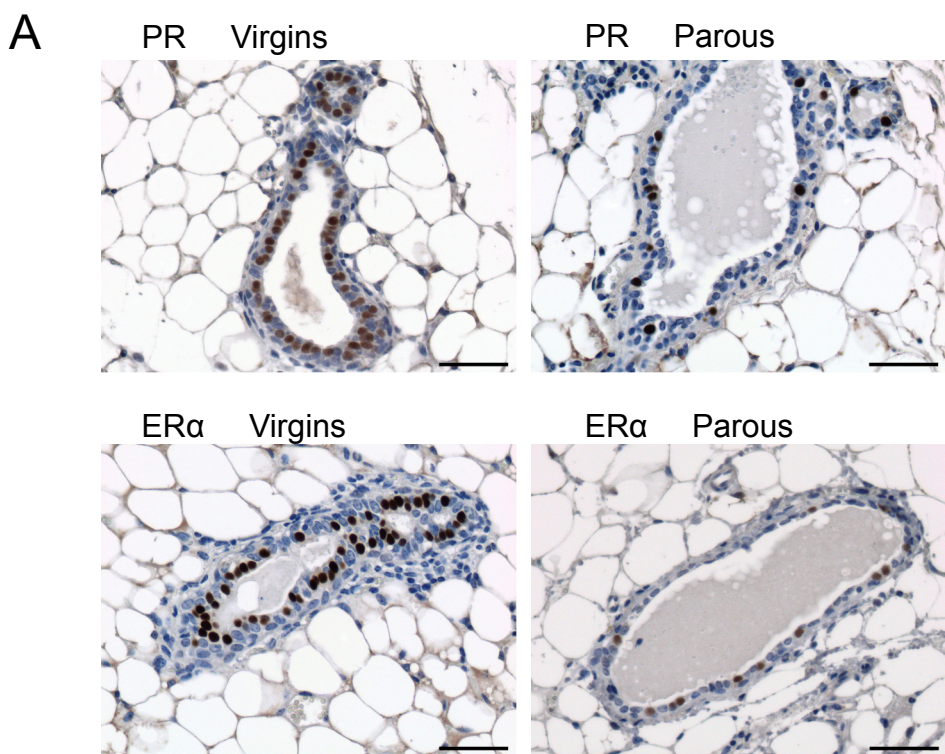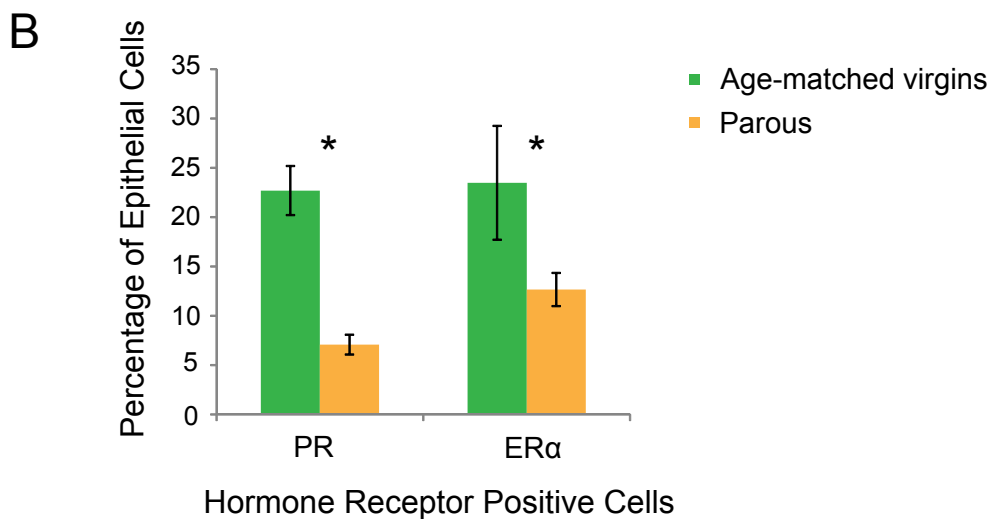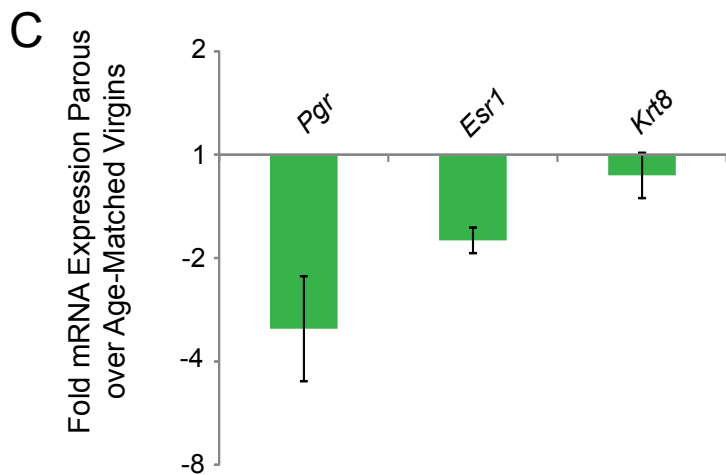

Supplement: MOESM15 [file 9703556]
